# Supplementary material for: SPORTS STARS study protocol: a randomised, controlled trial of the effectiveness of a physiotherapist-led modified sport intervention for ambulant school-aged children with cerebral palsy
Source: Springer Nature journal article supplement (doi:10.1186/s12887-018-1190-z), 2018-08-02
Supplement: MOESM1 [file 15997046]

Program Name: **Sports Stars**  
 Child's Name: \_\_\_\_\_  
 Week Number: **1 Soccer**

Facilitators: \_\_\_\_\_  
 Attending with: \_\_\_\_\_  
 Date: \_\_\_\_/\_\_\_\_/\_\_\_\_

| Activity                                                                                                                                                                                                                                                                                                                                                                            | Level 1                                                                                                                                                   | Level 2                                                 | Level 3                                                          | Notes                      |
|-------------------------------------------------------------------------------------------------------------------------------------------------------------------------------------------------------------------------------------------------------------------------------------------------------------------------------------------------------------------------------------|-----------------------------------------------------------------------------------------------------------------------------------------------------------|---------------------------------------------------------|------------------------------------------------------------------|----------------------------|
| <b>Warm Up (5 min) "Let's get our bodies sports ready!"</b>                                                                                                                                                                                                                                                                                                                         |                                                                                                                                                           |                                                         |                                                                  | <b>Engagement: 1 2 3 4</b> |
| <u>Range of motion</u><br><u>Upper limb / trunk</u> <ul style="list-style-type: none"> <li>• Roll shoulders</li> <li>• Circle arms</li> </ul> <u>Lower limb / trunk</u> <ul style="list-style-type: none"> <li>• Standing toe touch</li> <li>• Stork stand (quad stretch)</li> <li>• Ankle circles (SLS +/- hold for balance)</li> </ul>                                            | <u>Increase heart rate</u> <ul style="list-style-type: none"> <li>• High knees</li> <li>• Jump up/down; left/right</li> <li>• Modified burpees</li> </ul> |                                                         |                                                                  |                            |
| <b>ACTIVITY- Locomotor Skills (10 min) "How fast are your feet?"</b>                                                                                                                                                                                                                                                                                                                |                                                                                                                                                           |                                                         |                                                                  | <b>Engagement: 1 2 3 4</b> |
| <u>Running</u> <ul style="list-style-type: none"> <li>• Straight relay race</li> </ul>                                                                                                                                                                                                                                                                                              | Stops to pass, slow                                                                                                                                       | Slows down to pass, faster                              | Racing swiftly with smooth pass                                  |                            |
| <u>Agility &amp; Coordination</u> <ul style="list-style-type: none"> <li>• Weaving</li> </ul>                                                                                                                                                                                                                                                                                       | Large arc around cones                                                                                                                                    | Smaller arc, more forward facing body.                  | Small arc close to cones. Timed to increase speed                |                            |
| <ul style="list-style-type: none"> <li>• Toe tapping on soccer ball</li> </ul>                                                                                                                                                                                                                                                                                                      | Slowly, one foot at a time                                                                                                                                | Increase speed                                          | Hopping- moments of no ground contact                            |                            |
| <ul style="list-style-type: none"> <li>• Colour Square</li> </ul>                                                                                                                                                                                                                                                                                                                   | Large delay direction change.                                                                                                                             | Small delay in direction change, faster                 | Swift & coordinated direction change.                            |                            |
| <b>ACTIVITY – Object Control Skills (20 min) "Let's have a ball!"</b>                                                                                                                                                                                                                                                                                                               |                                                                                                                                                           |                                                         |                                                                  | <b>Engagement: 1 2 3 4</b> |
| <u>Eye-Foot Coordination</u><br>Stationary kicking into a goal                                                                                                                                                                                                                                                                                                                      | Goal 1.5m away. Kicks without stepping                                                                                                                    | Goal 3m away. Steps beside ball - kick with other foot. | Goal 5m away. Runs to ball and kicks with appropriate force.     |                            |
| Dribbling drills<br>- To far marker and back in straight line<br>- Weaving around markers in a zig zag pattern.                                                                                                                                                                                                                                                                     | Walking with large arc around cones.                                                                                                                      | Slow run with a wide arc around the far cone.           | Running with smaller arc around the far cone. Timed/ competitive |                            |
| <u>Eye-Head Coordination</u><br>Goal protection- Heading balls                                                                                                                                                                                                                                                                                                                      | Large ball thrown directly to child's head                                                                                                                | Medium ball to either side requiring step / lean.       | Soccer ball thrown to either side or ahead- must step.           |                            |
| <b>PARTICIPATION - Modified Sports Games (10 min) "It's game time!"</b>                                                                                                                                                                                                                                                                                                             |                                                                                                                                                           |                                                         |                                                                  | <b>Engagement: 1 2 3 4</b> |
| <u>Modified Games</u><br><b>Week 1 &amp; 2: Soccer</b><br>Modify as necessary.                                                                                                                                                                                                                                                                                                      | All participants work on the same team.                                                                                                                   | Children work on different teams.                       | Children work on different teams, include goal protection.       |                            |
| <b>COOL DOWN (5 min) "2Cool4School"</b>                                                                                                                                                                                                                                                                                                                                             |                                                                                                                                                           |                                                         |                                                                  | <b>Engagement: 1 2 3 4</b> |
| <u>Cool down</u><br>"Animal Yoga" – Dynamic weight bearing stretches, balance and cool down <ul style="list-style-type: none"> <li>- Downward dog (Hamstring and calf stretch)</li> <li>- Happy cat, angry cat (trunk ROM)</li> <li>- Flamingo (SLS)</li> <li>- Giraffe (side lunge- adductor &amp; lateral trunk stretch)</li> <li>- Butterfly (short adductor stretch)</li> </ul> |                                                                                                                                                           |                                                         |                                                                  |                            |
| Notes                                                                                                                                                                                                                                                                                                                                                                               |                                                                                                                                                           |                                                         |                                                                  |                            |

AHP Name: \_\_\_\_\_ Signature: \_\_\_\_\_
